# Supplementary material for: Molecular Mechanisms Associated with Clustered Lesion-Induced Impairment of 8-oxoG Recognition by the Human Glycosylase OGG1
Source: MDPI journal article supplement (doi:10.3390/molecules26216465), 2021-10-26
Supplement: s1 [file s1]

# Supplementary Materials: Molecular mechanisms associated with clustered lesion-induced impairment of 8-oxoG recognition by the human glycosylase OGG1

Tao Jiang <sup>2</sup>, Antonio Monari <sup>1,3</sup> , Elise Dumont <sup>2,4</sup>  and Emmanuelle Bignon <sup>1,\*</sup> 

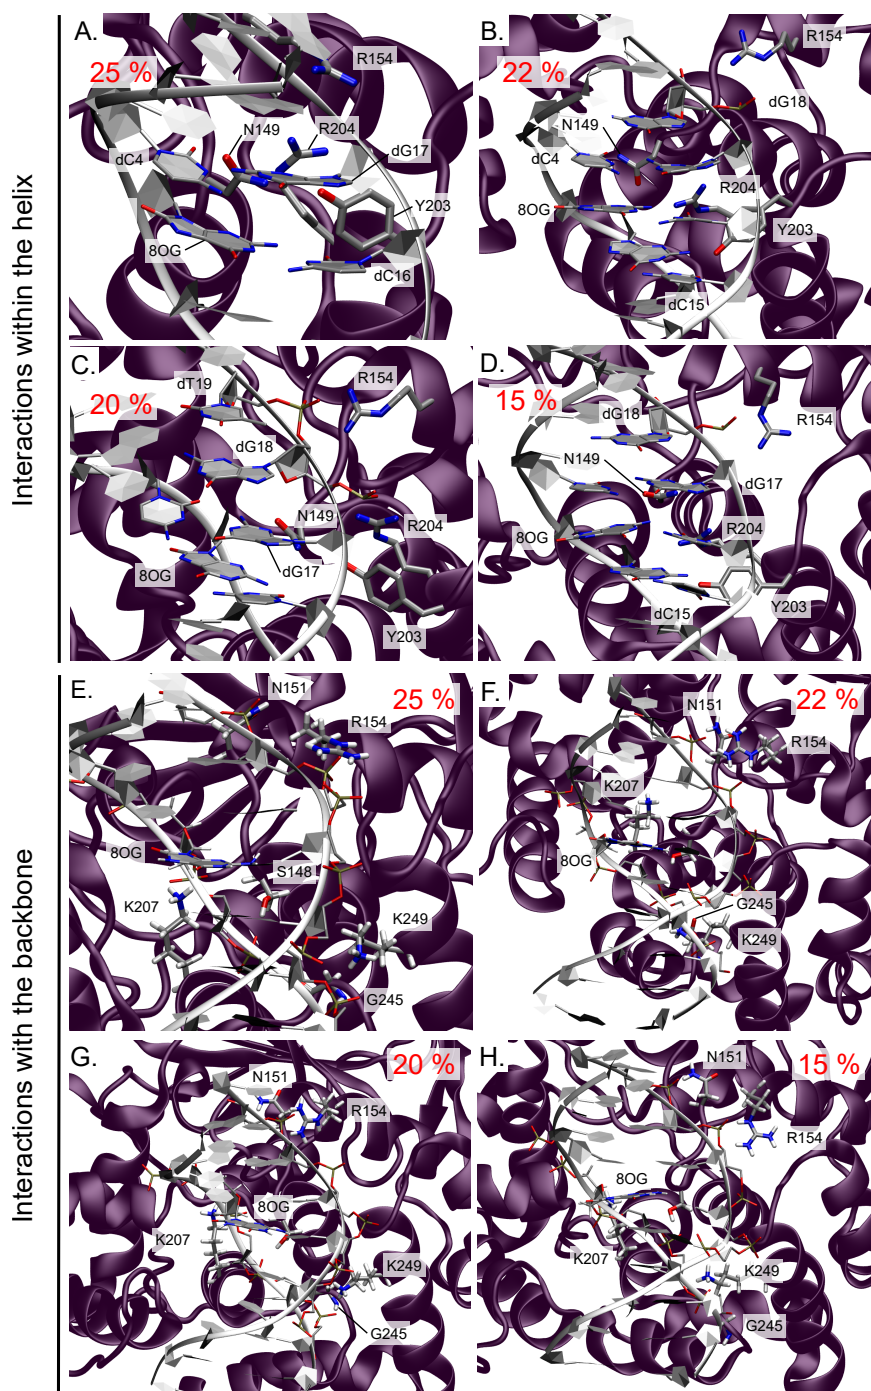

**Figure S1.** Representation of the key-interactions within the DNA helix (A. to D.) and with the DNA backbone (E. to H.) upon the presence of an isolated 8-oxoG for the four main clusters. The weight of the cluster is displayed in red.

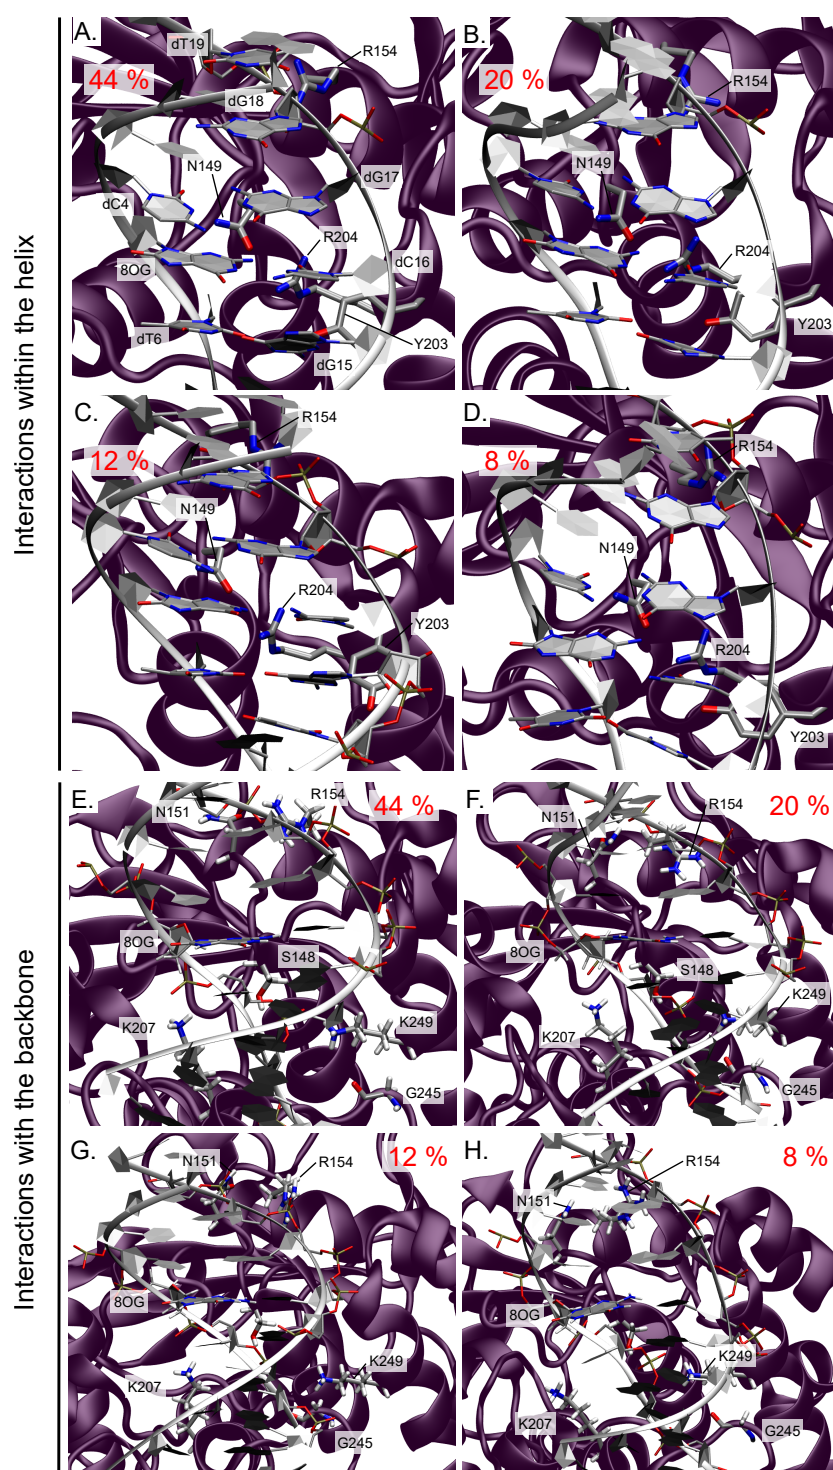

**Figure S2.** Representation of the key-interactions within the DNA helix (A. to D.) and with the DNA backbone (E. to H.) upon the presence of clustered 8-oxoG and 3' mismatch for the four main clusters. The weight of the cluster is displayed in red.



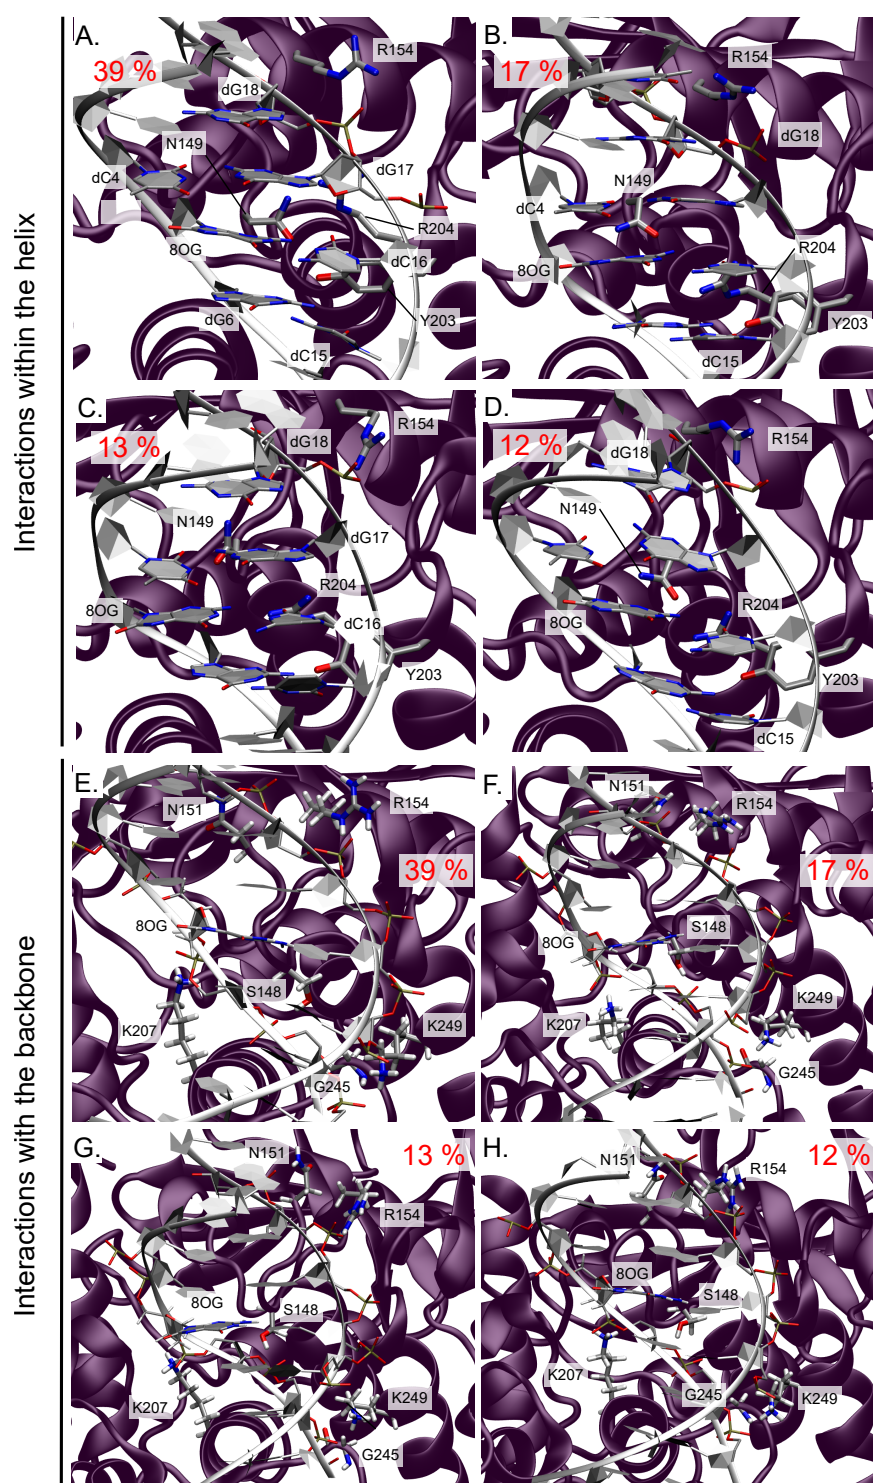

**Figure S3.** Representation of the key-interactions within the DNA helix (A. to D.) and with the DNA backbone (E. to H.) upon the presence of clustered 8-oxoG and 5' mismatch for the four main clusters. The weight of the cluster is displayed in red.

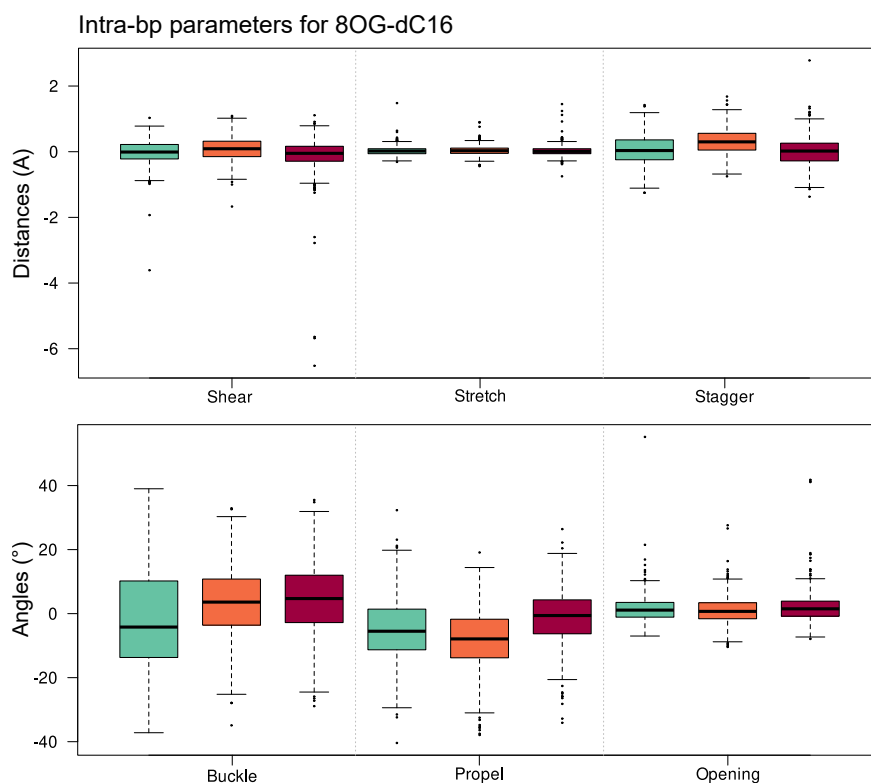

**Figure S4.** Intra-base pair structural parameters of the 8-oxoG-dC16 base pair in systems harboring an isolated 8-oxoG (cyan), clustered 8-oxoG + 3' mismatch (orange) or clustered 8-oxoG + 5' mismatch (red).

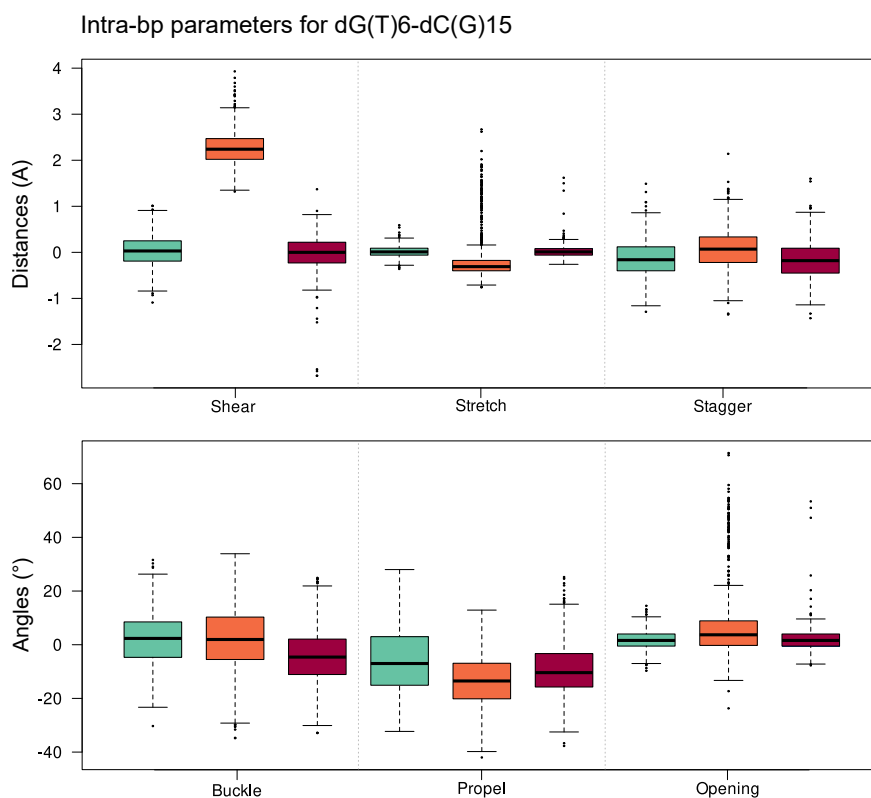

**Figure S5.** Intra-base pair structural parameters of the dG(T)6-dC(G)15 base pair 3' to the 8-oxoG in systems harboring an isolated 8-oxoG (cyan), clustered 8-oxoG + 3' mismatch (orange) or clustered 8-oxoG + 5' mismatch (red).



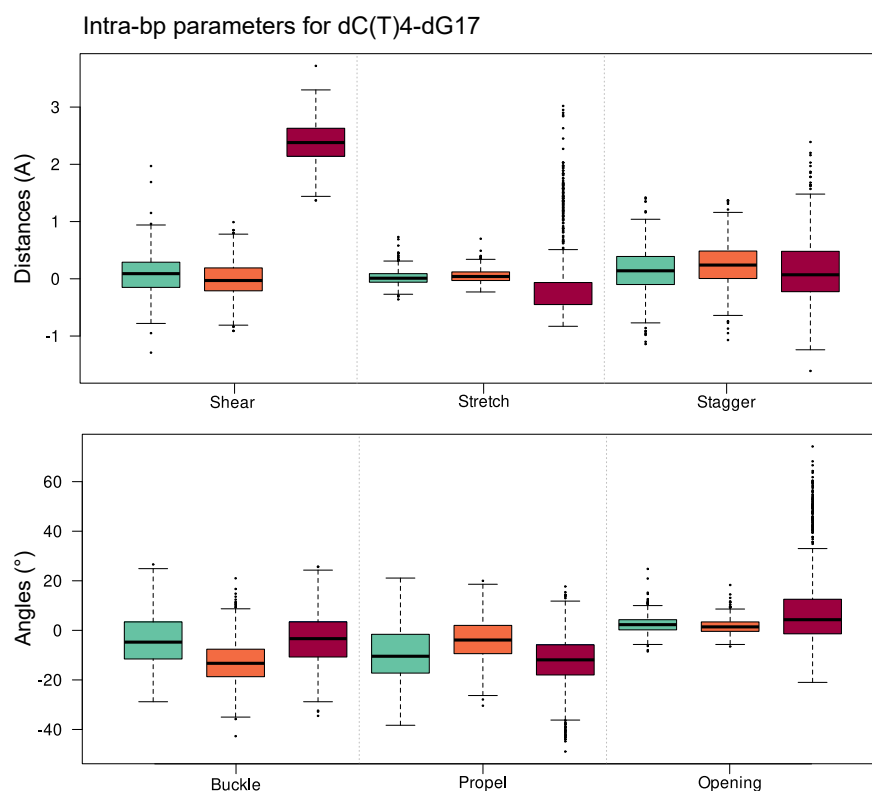

**Figure S6.** Intra-base pair structural parameters of the dC(T)4-dG17 base pair 3' to the 8-oxoG in systems harboring an isolated 8-oxoG (cyan), clustered 8-oxoG + 3' mismatch (orange) or clustered 8-oxoG + 5' mismatch (red).

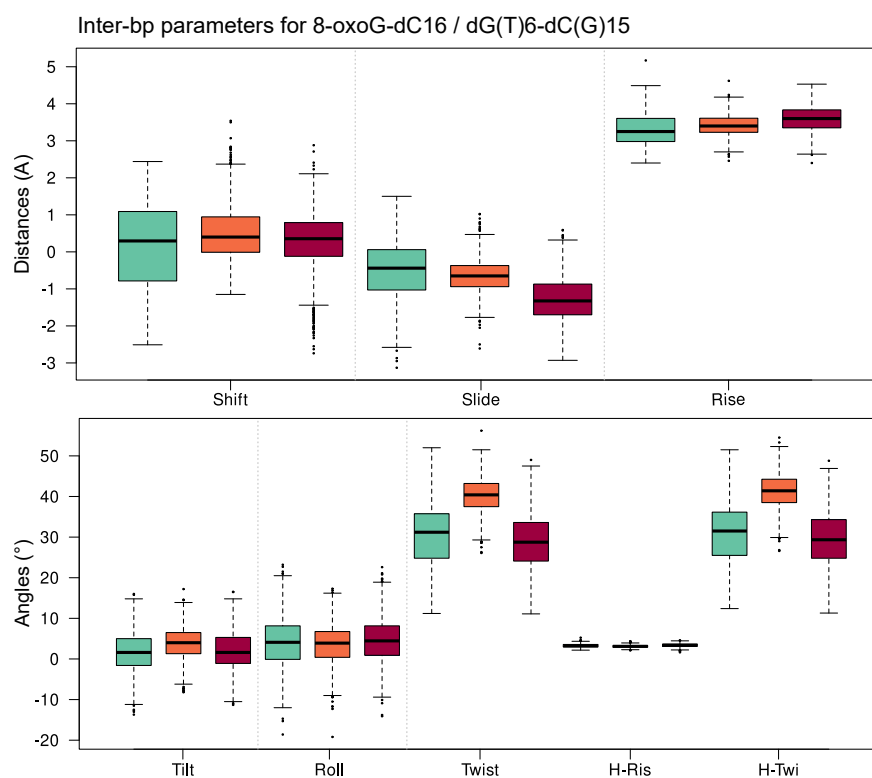

**Figure S7.** Inter-base pairs structural parameters of the 8-oxoG-dC16 / dG(T)6-dC(G)15 base pairs in systems harboring an isolated 8-oxoG (cyan), clustered 8-oxoG + 3' mismatch (orange) or clustered 8-oxoG + 5' mismatch (red).

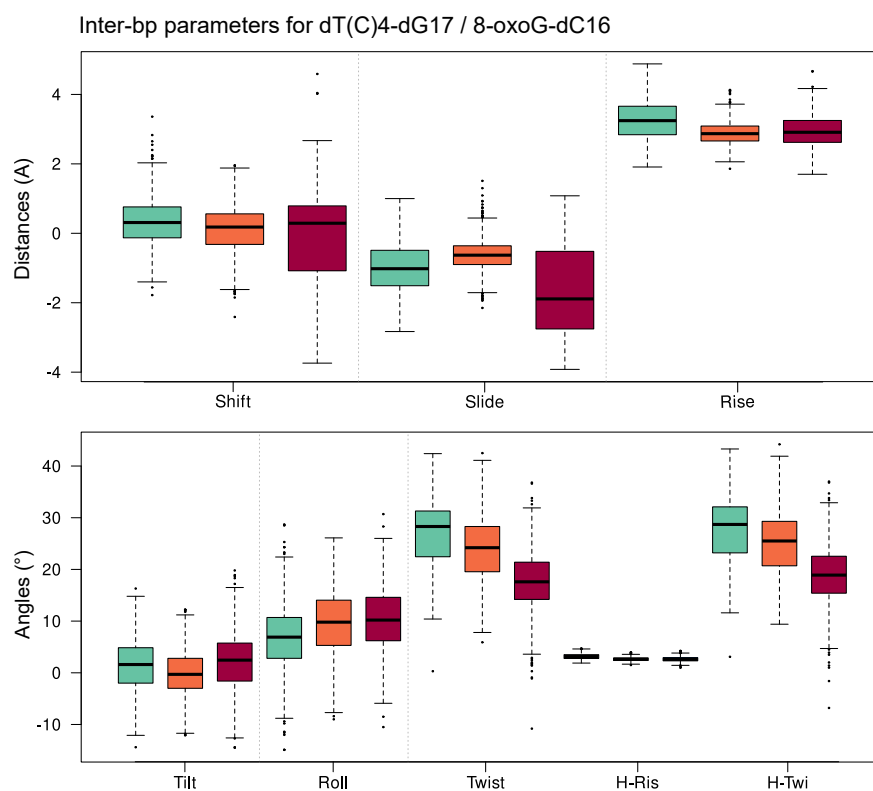

**Figure S8.** Inter-base pairs structural parameters of the dC(T)4-dG17 / 8-oxoG-dC16 base pairs in systems harboring an isolated 8-oxoG (cyan), clustered 8-oxoG + 3' mismatch (orange) or clustered 8-oxoG + 5' mismatch (red).

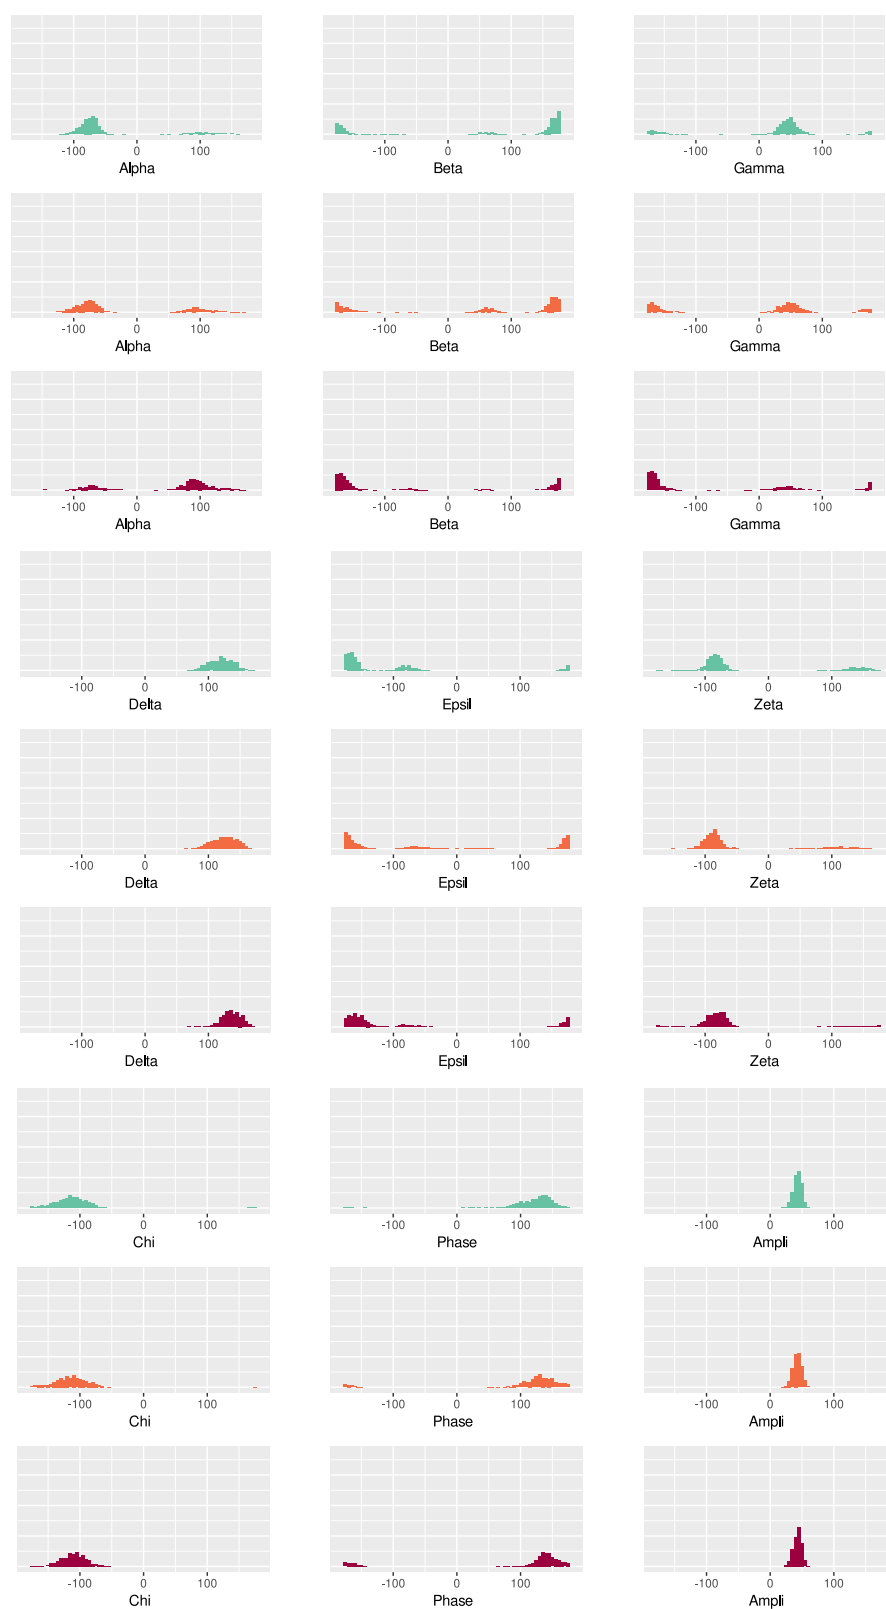

**Figure S9.** Distribution of 8-oxoG backbone angles values in systems harboring an isolated 8-oxoG (cyan), clustered 8-oxoG + 3' mismatch (orange) or clustered 8-oxoG + 5' mismatch (red).



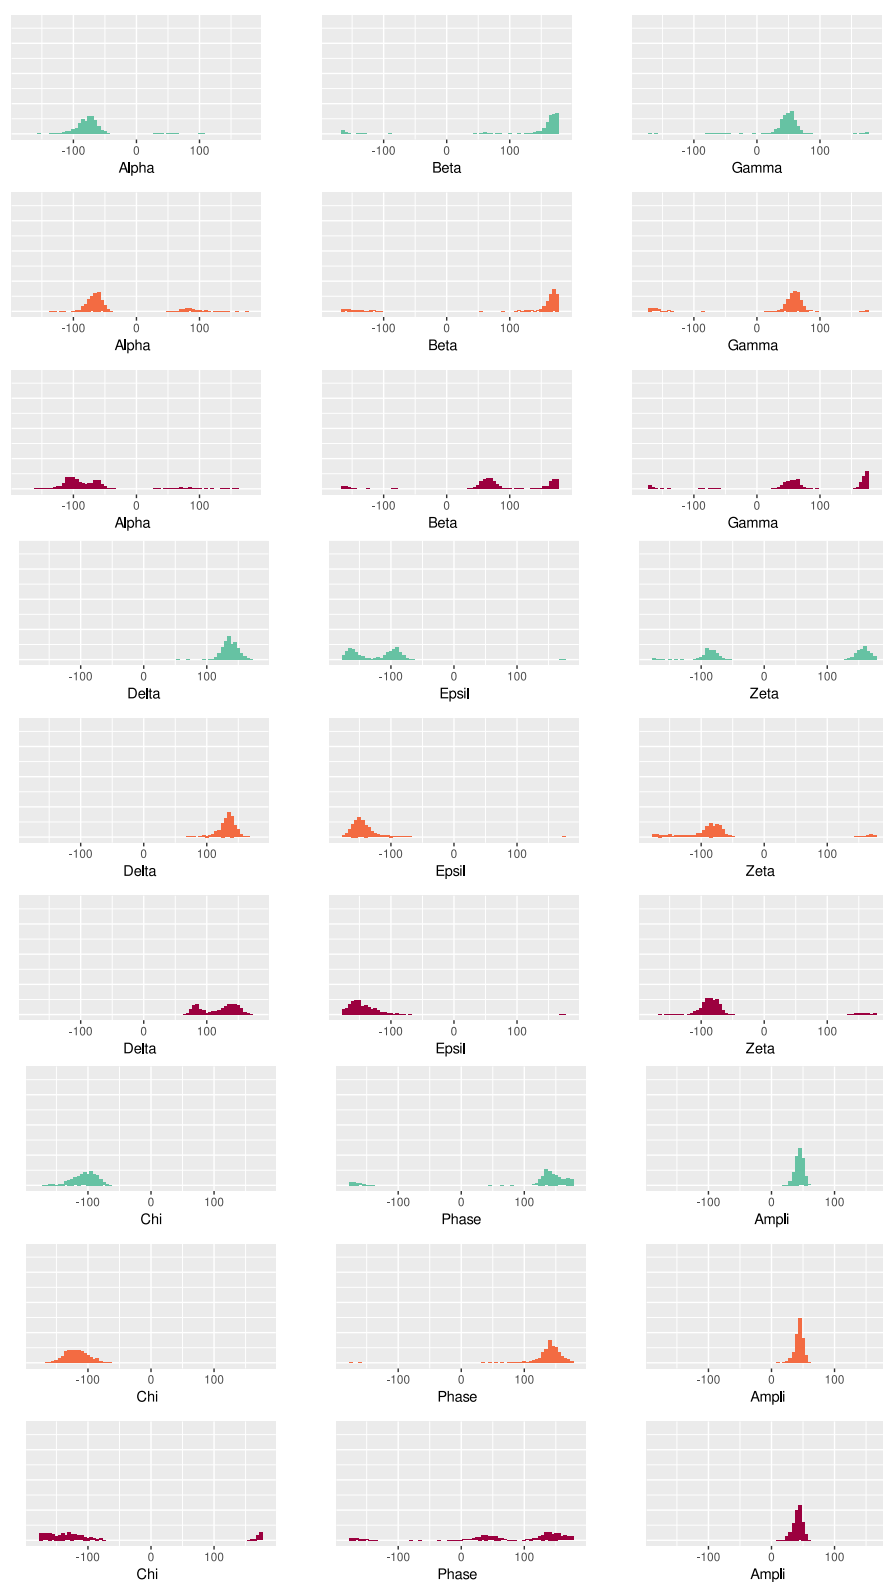

**Figure S10.** Distribution of dG(T)6 backbone angles values in systems harboring an isolated 8-oxoG (cyan), clustered 8-oxoG + 3' mismatch (orange) or clustered 8-oxoG + 5' mismatch (red).

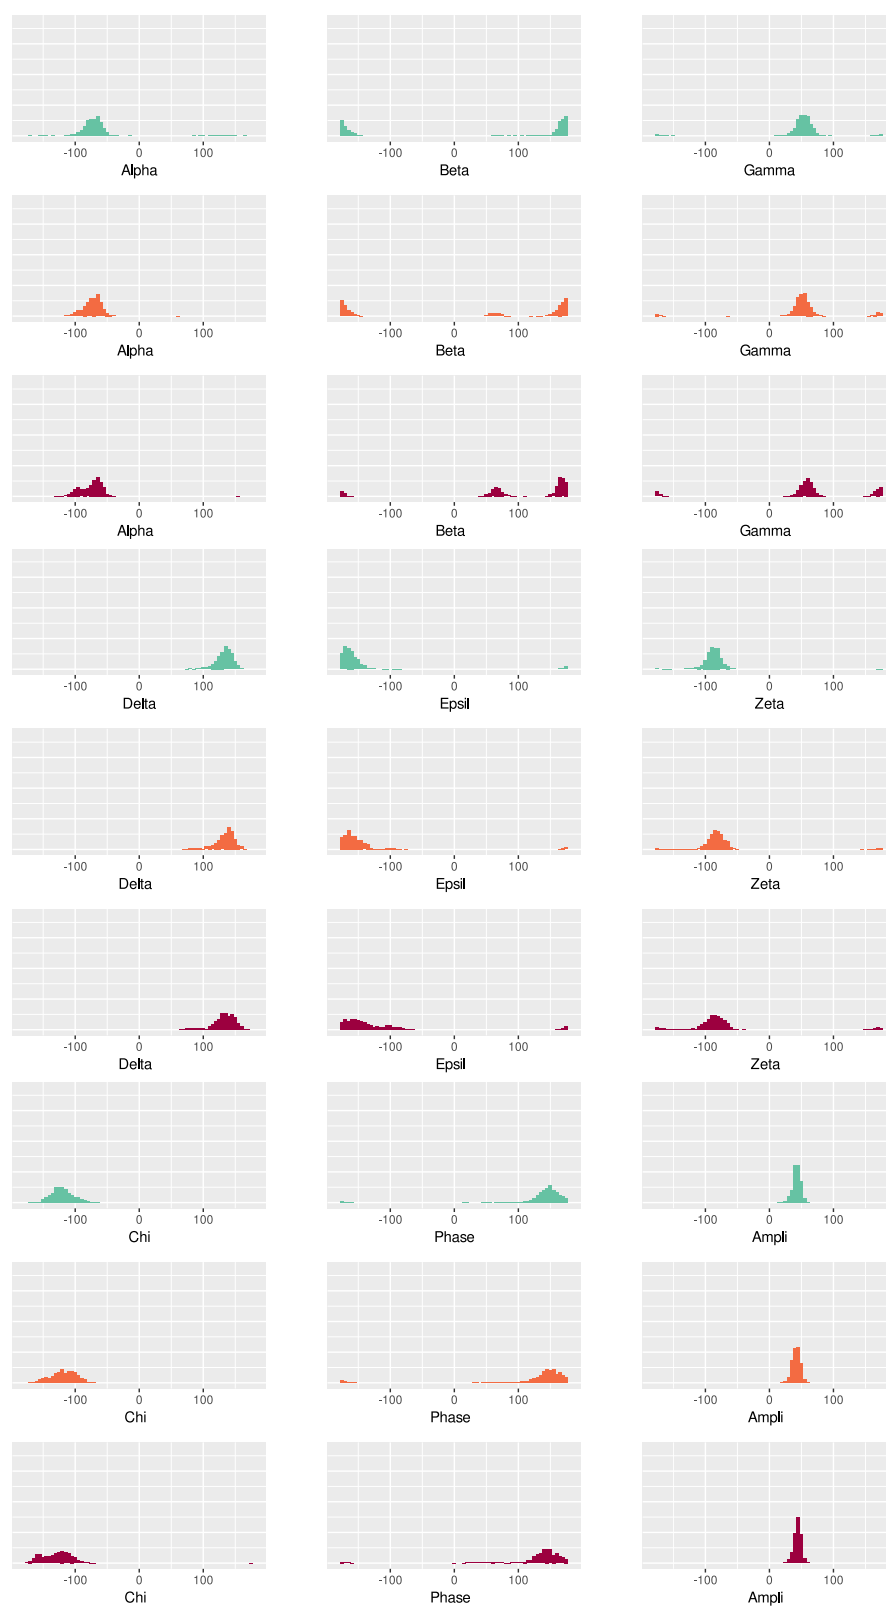

**Figure S11.** Distribution of the dC(T)4 backbone angles values in systems harboring an isolated 8-oxoG (cyan), clustered 8-oxoG + 3' mismatch (orange) or clustered 8-oxoG + 5' mismatch (red).
